# Supplementary figures and images for: Effect of Size on Magnetic Polyelectrolyte Microcapsules Behavior: Biodistribution, Circulation Time, Interactions with Blood Cells and Immune System
Source: MDPI journal article supplement (doi:10.3390/pharmaceutics13122147), 2021-12-14

## 1 $\mu\text{m}$ capsules

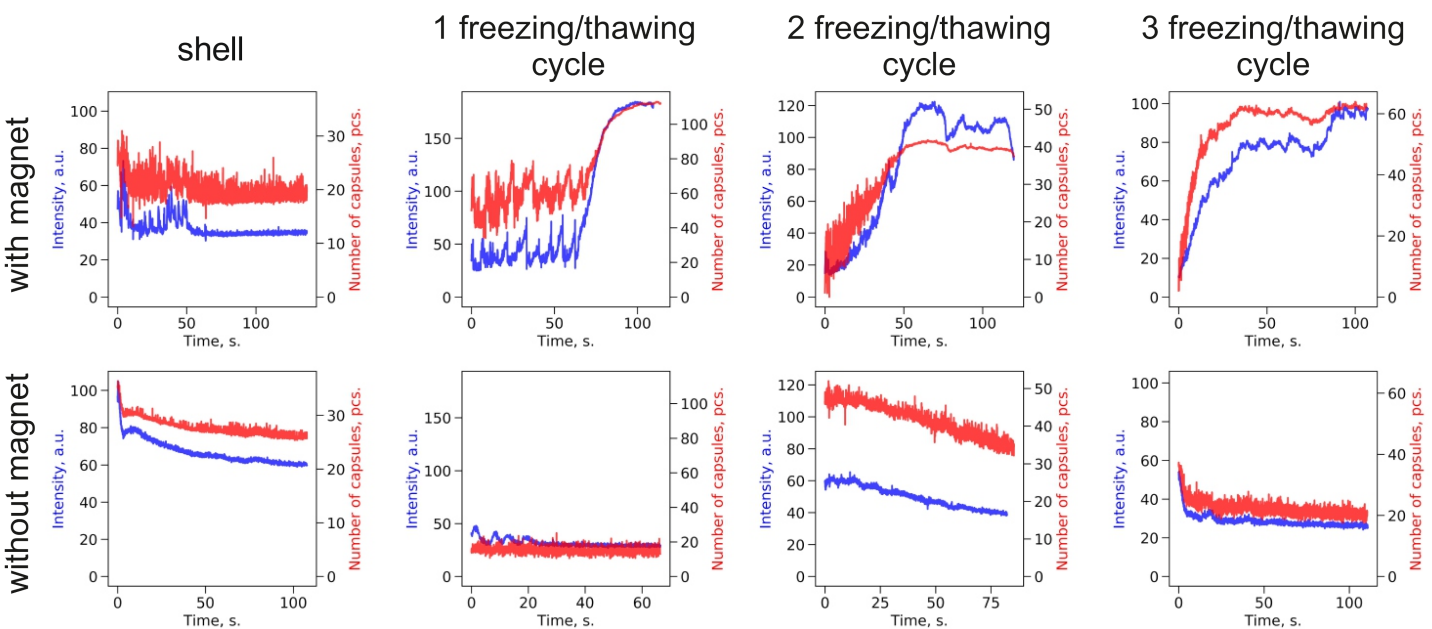

## 2.7 $\mu\text{m}$ capsules

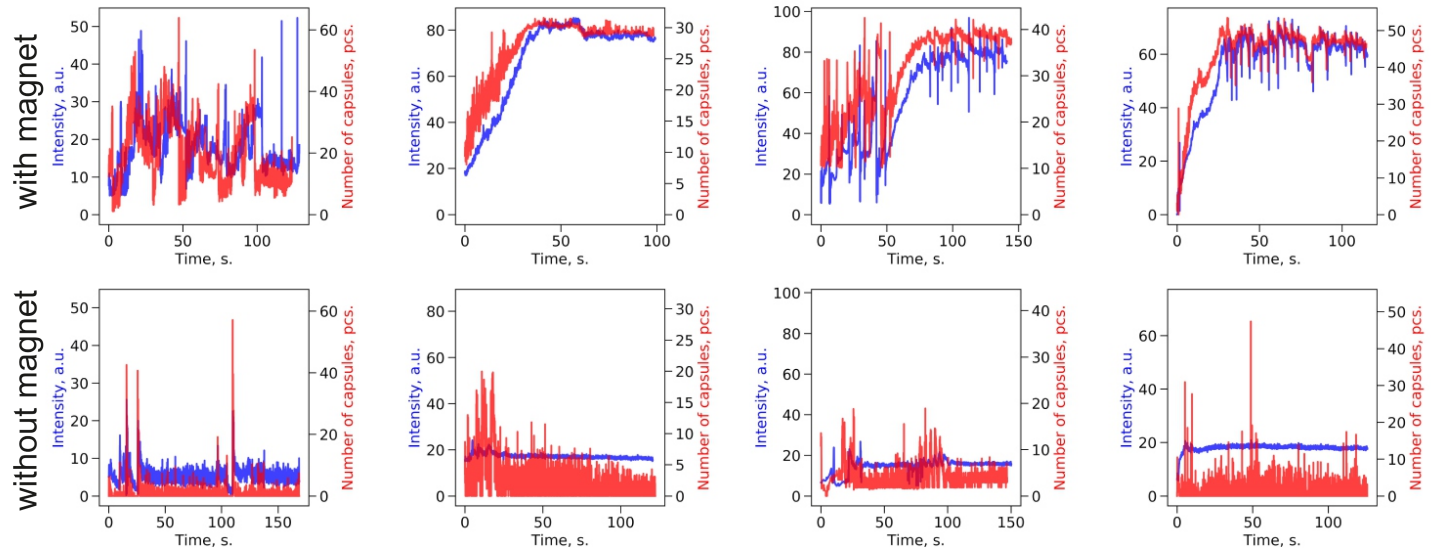

## 5.5 $\mu\text{m}$ capsules

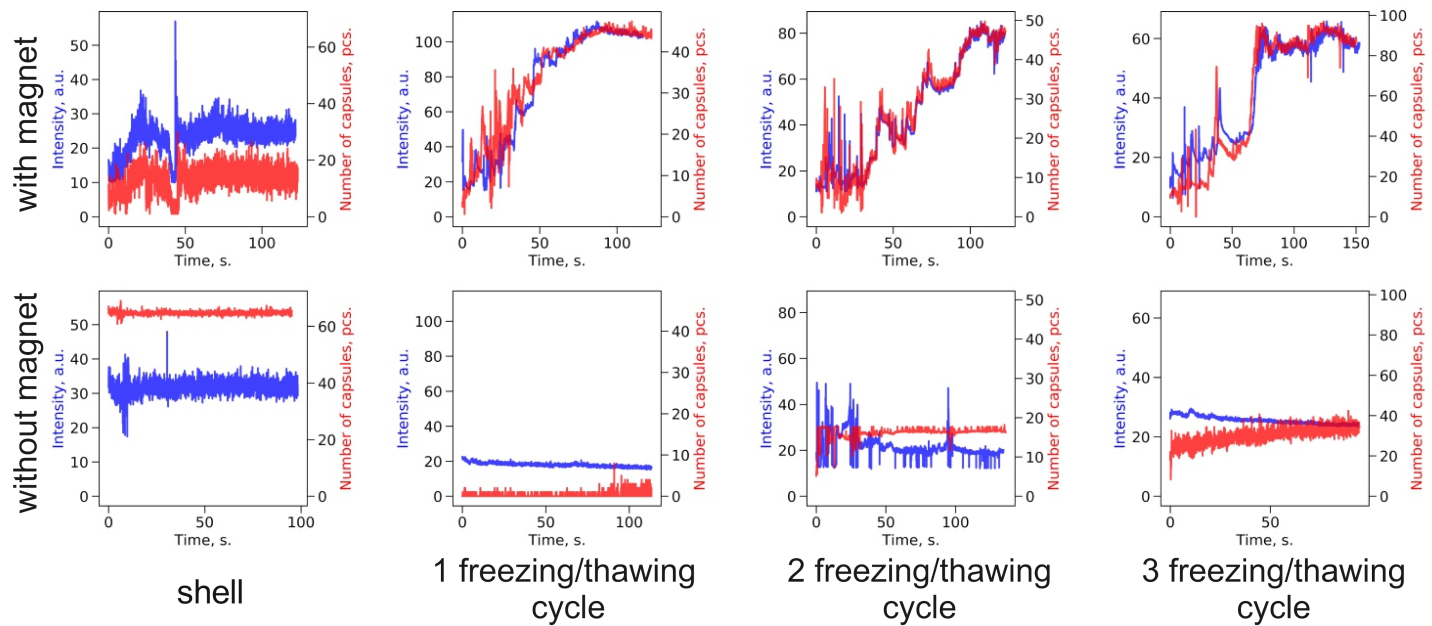

Supplement: s1 [file s1]
